# Supplementary material
Source: PubMed Central journal article supplement (PMC4748438)
Supplement: npp2015254x2.pdf [file npp2015254x2.pdf]

Table S1. Comparison of characteristics of training and testing cohorts.

| Feature                              | Training set (N=3850) |       | Testing set (N=1901) |       | Comparison            |
|--------------------------------------|-----------------------|-------|----------------------|-------|-----------------------|
|                                      | n                     | pct   | n                    | pct   | X <sup>2</sup> (1df)* |
| Case (renal failure)                 | 991                   | 26%   | 454                  | 24%   | 2.34                  |
| Sex, male                            | 1678                  | 44%   | 854                  | 45%   | 0.93                  |
| Race, white                          | 3185                  | 83%   | 1589                 | 84%   | 0.67                  |
| Insurance, private                   | 1560                  | 41%   | 765                  | 40%   | 0.04                  |
| Hypertension, lifetime               | 1315                  | 34%   | 609                  | 32%   | 2.57                  |
| Diabetes mellitus, lifetime          | 660                   | 17%   | 315                  | 17%   | 0.30                  |
| Smoking, lifetime                    | 1014                  | 26%   | 497                  | 26%   | 0.02                  |
| Schizophrenia or schizoaffective     | 584                   | 15%   | 302                  | 16%   | 0.50                  |
| Any second-generation antipsychotic  | 1392                  | 36%   | 727                  | 38%   | 2.38                  |
| Any first-generation antipsychotic   | 239                   | 6%    | 113                  | 6%    | 0.15                  |
| Any SSRI or SNRI                     | 1047                  | 27%   | 500                  | 26%   | 0.52                  |
| Once-daily lithium dosing            | 1481                  | 38%   | 726                  | 38%   | 0.04                  |
| Extended-release lithium preparation | 849                   | 22%   | 409                  | 22%   | 0.21                  |
| Feature                              | mean                  | SD    | mean                 | SD    | Student's T           |
| Age (years)                          | 43.52                 | 16.73 | 43.77                | 16.99 | -0.54                 |
| Charlson index (age-adjusted)        | 2.22                  | 3.18  | 2.27                 | 3.39  | -0.61                 |

\*p>0.1 for all comparisons

Table S2. Multiple logistic regression model of renal insufficiency risk (N=3850),  
omitting Charlson index and insurance type

|                                   | Univariate,<br>Odds Ratio | Adjusted       |            |                      |            |
|-----------------------------------|---------------------------|----------------|------------|----------------------|------------|
|                                   |                           | Odds Ratio     | p-value    | [95% Conf. Interval] |            |
| Sex, male                         | 0.68                      | 0.62           | <.001      | 0.52                 | 0.73       |
| Race/ethnicity, white             | 1.63                      | 1.68           | <.001      | 1.31                 | 2.14       |
| Age (per decade)                  | 1.80                      | 1.68           | <.001      | 1.59                 | 1.78       |
| <i>Charlson index (Log10)</i>     | 2.68                      | <i>omitted</i> | <i>n/a</i> | <i>n/a</i>           | <i>n/a</i> |
| <i>Insurance, private</i>         | 1.01                      | <i>omitted</i> | <i>n/a</i> | <i>n/a</i>           | <i>n/a</i> |
| Lifetime hypertension             | 4.74                      | 2.69           | <.001      | 2.24                 | 3.23       |
| Lifetime smoking                  | 1.79                      | 1.59           | <.001      | 1.32                 | 1.90       |
| Lifetime diabetes mellitus        | 3.16                      | 1.44           | 0.001      | 1.17                 | 1.79       |
| Any schizophrenia/schizoaffective | 1.72                      | 1.49           | <.001      | 1.19                 | 1.85       |
